# Supplementary material for: Dynamic Interplay between Copper Toxicity and Mitochondrial Dysfunction in Alzheimer’s Disease
Source: MDPI journal article supplement (doi:10.3390/life11050386), 2021-04-24
Supplement: s1 [file s1]

# Dynamic interplay between copper toxicity and mitochondrial dysfunction in Alzheimer's Disease

Giusy Tassone<sup>#</sup>, Arian Kola<sup>#</sup>, Daniela Valensin<sup>\*</sup> and Cecilia Pozzi<sup>\*</sup>

Department of Biotechnology, Chemistry and Pharmacy – Department of Excellence 2018-2020, University of Siena, via Aldo Moro 2, Siena, 53100, Italy; [giusy.tassone@unisi.it](mailto:giusy.tassone@unisi.it) (G.T.), [kola2@student.unisi.it](mailto:kola2@student.unisi.it) (A.K.).

<sup>#</sup> These authors contributed equally.

<sup>\*</sup> Correspondence: [daniela.valensin@unisi.it](mailto:daniela.valensin@unisi.it) (D.V.), [pozzi4@unisi.it](mailto:pozzi4@unisi.it) (C.P.); Tel.: +39 0577 232428 (D.V.), +39 0577 232132 (C.P.)

## Contents

|            |    |
|------------|----|
| Table S1   | S2 |
| Table S2   | S3 |
| Table S3   | S5 |
| References | S6 |

**Table S1.** Summary of dysregulated mitochondrial proteins (name and acronym, UniProtKB code and gene name) in cortex of copper-exposed mice [1]. Their expression levels are reported as increased (↑) or decreased (↓). Protein alternative names and reference codes are given in Table S2.

| Protein name                                             | UniProtKB code<br>( <i>Mus musculus</i> ) | Gene name | Expression level<br>(copper treatment versus control) |
|----------------------------------------------------------|-------------------------------------------|-----------|-------------------------------------------------------|
| NADH dehydrogenase [ubiquinone] flavoprotein 1 (CI-51kD) | Q91YT0                                    | NDUFV1    | ↑                                                     |
| Cytochrome b-c1 complex subunit 2 (CIII-s2)              | Q9DB77                                    | UQCRC2    | ↑                                                     |
| ATP synthase subunit d (ATPase-d)                        | Q9DCX2                                    | ATP5PD    | ↓                                                     |
| 75 kDa glucose-regulated protein (GRP75)                 | P38647                                    | HSPA9     | ↓                                                     |
| 78 kDa glucose-regulated protein (GRP78)                 | P20029                                    | HSPA5     | ↓                                                     |
| Aspartate aminotransferase                               | P05202                                    | Got2      | ↑                                                     |
| Electron transfer flavoprotein subunit $\alpha$          | Q99LC5                                    | ETFA      | ↑                                                     |
| Dynein light chain                                       | P63168                                    | DYNLL1    | ↑                                                     |
| Macrophage migration inhibitory factor                   | P34884                                    | MIF       | ↑                                                     |
| Dihydropyrimidinase-related protein 2                    | O08553                                    | DPYSL2    | ↑                                                     |
| Vesicle-fusing ATPase                                    | P46460                                    | NSF       | ↓                                                     |
| Isocitrate dehydrogenase [NAD] subunit $\alpha$          | Q9D6R2                                    | IDH3A     | ↓                                                     |
| Myelin basic protein                                     | P04370                                    | MBP       | ↓                                                     |

**Table S2.** Summary of protein alternative names and reference codes (UniProtKB and gene name) for the main mitochondrial targets identified by proteomics [1,2] and redox proteomics studies [3–5]. Mouse (*Mus musculus*) and human UniProtKB codes and gene names are given where required.

| Protein name                                                                     | UniProtKB code                                   | Gene name                              | Alternative protein names                                                                                                                                                                                                          |
|----------------------------------------------------------------------------------|--------------------------------------------------|----------------------------------------|------------------------------------------------------------------------------------------------------------------------------------------------------------------------------------------------------------------------------------|
| Cytochrome b-c1 complex subunit 2 (CIII-s2)                                      | Q9DB77 ( <i>Mus musculus</i> )<br>P22695 (human) | UQCRC2 ( <i>Mus musculus</i> , human)  | Complex III subunit 2, Core protein II, Ubiquinol-cytochrome-c reductase complex core protein 2                                                                                                                                    |
| NADH dehydrogenase [ubiquinone] flavoprotein 1 (CI-51kD)                         | Q91YT0 ( <i>Mus musculus</i> )<br>P49821 (human) | NDUFV1 ( <i>Mus musculus</i> , human)  | Complex I-51kD, NADH-ubiquinone oxidoreductase 51 kDa subunit                                                                                                                                                                      |
| ATP synthase subunit d (ATPase-d)                                                | Q9DCX2 ( <i>Mus musculus</i> )<br>O75947 (human) | ATP5PD ( <i>Mus musculus</i> , human)  | ATPase subunit d, ATP synthase peripheral stalk subunit d                                                                                                                                                                          |
| 75 kDa glucose-regulated protein (GRP75)                                         | P38647 ( <i>Mus musculus</i> )<br>P38646 (human) | HSPA9 ( <i>Mus musculus</i> , human)   | 75 kDa glucose-regulated protein, GRP-75, Heat shock 70 kDa protein 9, Mortalin, Peptide-binding protein 74, PBP74, p66 MOT                                                                                                        |
| 78 kDa glucose-regulated protein (GRP78)                                         | P20029 ( <i>Mus musculus</i> )<br>P11021 (human) | HSPA5 ( <i>Mus musculus</i> , human)   | 78 kDa glucose-regulated protein1, GRP-78, Binding-immunoglobulin protein1, BiP, Heat shock protein 70 family protein 5, HSP70 family protein 5C, Heat shock protein family A member 5, Immunoglobulin heavy chain-binding protein |
| NADH dehydrogenase [ubiquinone] 1 $\alpha$ subcomplex subunit 1 (CI- $\alpha$ 1) | O35683 ( <i>Mus musculus</i> )<br>O15239 (human) | NDUFA1 ( <i>Mus musculus</i> , human)  | Complex I-MWFE, CI-MWFE, NADH-ubiquinone oxidoreductase MWFE subunit                                                                                                                                                               |
| NADH dehydrogenase [ubiquinone] iron-sulfur protein 2 (CI-49kD)                  | O75306 ( <i>Mus musculus</i> )<br>O15239 (human) | NDUFS2 ( <i>Mus musculus</i> , human)  | Complex I-49kD, CI-49kD, NADH-ubiquinone oxidoreductase 49 kDa subunit                                                                                                                                                             |
| NADH dehydrogenase [ubiquinone] iron-sulfur protein 8 (CI-23kD)                  | Q8K3J1 ( <i>Mus musculus</i> )<br>O00217 (human) | NDUFS8 ( <i>Mus musculus</i> , human)  | Complex I-23kD, CI-23kD, NADH-ubiquinone oxidoreductase 23 kDa subunit                                                                                                                                                             |
| Cytochrome b-c1 complex subunit Rieske (CIII-RISP)                               | Q9CR68 ( <i>Mus musculus</i> )<br>P47985 (human) | UQCRRF1 ( <i>Mus musculus</i> , human) | Complex III subunit 5, Cytochrome b-c1 complex subunit 5, Rieske iron-sulfur protein, RISP, Rieske protein UQCRRF1, Ubiquinol-cytochrome c reductase iron-sulfur subunit                                                           |
| Cytochrome c oxidase subunit 5A (CIV-COX5A)                                      | P12787 ( <i>Mus musculus</i> )<br>P47985 (human) | COX5A ( <i>Mus musculus</i> , human)   | Cytochrome c oxidase polypeptide Va                                                                                                                                                                                                |
| Cytochrome c oxidase subunit 5B (CIV-COX5B)                                      | P19536 ( <i>Mus musculus</i> )<br>P10606 (human) | COX5B ( <i>Mus musculus</i> , human)   | Cytochrome c oxidase polypeptide Vb                                                                                                                                                                                                |
| ATP-Citrate synthase (ATP-CS)                                                    | Q91V92 ( <i>Mus musculus</i> )<br>P53396 (human) | ACLY ( <i>Mus musculus</i> , human)    | ATP-citrate (pro-S)-lyase, Citrate cleavage enzyme                                                                                                                                                                                 |
| Malate dehydrogenase (MDH)                                                       | P08249 ( <i>Mus musculus</i> )<br>P40926 (human) | MDH2 ( <i>Mus musculus</i> , human)    | Cytosolic malate dehydrogenase                                                                                                                                                                                                     |
| Pyruvate dehydrogenase E1 component subunit $\alpha$ (PDHE1-A1)                  | P35486 ( <i>Mus musculus</i> )<br>P08559 (human) | PDHA1 ( <i>Mus musculus</i> , human)   | PDHE1-A type I                                                                                                                                                                                                                     |
| Pyruvate dehydrogenase (acetyl-transferring) kinase isoform 2 (PDKII)            | Q9JK42 ( <i>Mus musculus</i> )<br>Q15119 (human) | PDK2 ( <i>Mus musculus</i> , human)    | Pyruvate dehydrogenase kinase isoform 2, PDH kinase 2                                                                                                                                                                              |

|                                                             |                                                  |                                                 |                                                                                                                                                                  |
|-------------------------------------------------------------|--------------------------------------------------|-------------------------------------------------|------------------------------------------------------------------------------------------------------------------------------------------------------------------|
| Creatine kinase U-type (Mia-CK)                             | P30275 ( <i>Mus musculus</i> )<br>C9JT96 (human) | CKMT1 ( <i>Mus musculus</i> )<br>CKMT1A (human) | Acidic-type mitochondrial creatine kinase, Mia-CK, Ubiquitous mitochondrial creatine kinase, U-MtCK                                                              |
| Voltage-dependent anion-selective channel protein 1 (VDAC1) | Q60932 ( <i>Mus musculus</i> )<br>P21796 (human) | VDAC1 ( <i>Mus musculus</i> , human)            | VDAC-1, VDAC1, Outer mitochondrial membrane protein porin 1, Plasmalemmal porin, Porin 31HL, Porin 31HM                                                          |
| Voltage-dependent anion-selective channel protein 2 (VDAC2) | Q60930 ( <i>Mus musculus</i> )<br>P45880 (human) | VDAC2 ( <i>Mus musculus</i> , human)            | VDAC-2, VDAC2, Outer mitochondrial membrane protein porin 2                                                                                                      |
| ADT/ATP translocase 1 (ANT1)                                | P48962 ( <i>Mus musculus</i> )<br>P12235 (human) | Slc25a4 ( <i>Mus musculus</i> , human)          | ADP,ATP carrier protein 1, ADP,ATP carrier protein, heart/skeletal muscle isoform T1 Adenine nucleotide translocator 1, ANT 1, Solute carrier family 25 member 4 |
| ATP synthase subunit $\alpha$ (ATPase- $\alpha$ )           | P25705 (human)                                   | ATP5F1A (human)                                 | ATP synthase F1 subunit $\alpha$                                                                                                                                 |
| Aconitate hydratase (Aconitase)                             | Q99798 (human)                                   | ACO2 (human)                                    | Aconitase, Citrate hydro-lyase                                                                                                                                   |
| Superoxide dismutase [Mn] (MnSOD)                           | P04179 (human)                                   | SOD2 (human)                                    |                                                                                                                                                                  |

**Table S3.** Summary of dysregulated mitochondrial proteins (protein name, UniProtKB code and gene name) in the hippocampus of copper-exposed 3xTg-AD mice [2]. Their expression levels are reported as increased (↑) or decreased (↓). Protein alternative names and reference codes are given in Table S2.

| Protein name                                                                     | UniProtKB code<br>( <i>Mus musculus</i> ) | Gene name | Expression level<br>(copper treatment versus control) |
|----------------------------------------------------------------------------------|-------------------------------------------|-----------|-------------------------------------------------------|
| NADH dehydrogenase [ubiquinone] 1 $\alpha$ subcomplex subunit 1 (CI- $\alpha$ 1) | O35683                                    | NDUFA1    | ↓                                                     |
| NADH dehydrogenase [ubiquinone] iron-sulfur protein 2 (CI-49kD)                  | Q91WD5                                    | NDUFS2    | ↑                                                     |
| NADH dehydrogenase [ubiquinone] iron-sulfur protein 8 (CI-23kD)                  | Q8K3J1                                    | NDUFS8    | ↓                                                     |
| Creatine kinase U-type (Mia-CK)                                                  | P30275                                    | CKMT1     | ↑                                                     |
| ATP-Citrate synthase (ATP-CS)                                                    | Q91V92                                    | ACLY      | ↑                                                     |
| Malate dehydrogenase (MDH)                                                       | P08249                                    | MDH2      | ↑                                                     |
| Pyruvate dehydrogenase E1 component subunit $\alpha$ (PDHE1-A1)                  | P35486                                    | PDHA1     | ↓                                                     |
| Pyruvate dehydrogenase (acetyl-transferring) kinase isozyme 2 (PDKII)            | Q9JK42                                    | PDK2      | ↑                                                     |
| Cytochrome b-c1 complex subunit Rieske (CIII-RISP)                               | Q9CR68                                    | UQCRCF1   | ↓                                                     |
| Cytochrome c oxidase subunit 5A (CIV-COX5A)                                      | P12787                                    | COX5A     | ↓                                                     |
| Cytochrome c oxidase subunit 5B (CIV-COX5B)                                      | P19536                                    | COX5B     | ↓                                                     |
| ATP synthase subunit d (ATPase-d)                                                | Q9DCX2                                    | ATP5PD    | ↓                                                     |
| Voltage-dependent anion-selective channel protein 1 (VDAC1)                      | Q60932                                    | VDAC1     | ↓                                                     |
| Voltage-dependent anion-selective channel protein 2 (VDAC2)                      | Q60930                                    | VDAC2     | ↓                                                     |
| Elongation factor 1- $\alpha$ 1                                                  | P10126                                    | EEF1A1    | ↑                                                     |
| Vesicle-fusing ATPase                                                            | P46460                                    | NSF       | ↑                                                     |
| Actin, aortic smooth muscle                                                      | P62737                                    | ACTA2     | ↑                                                     |
| Actin, cytoplasmatic 1                                                           | P60710                                    | ACTB      | ↑                                                     |
| Dihydropyrimidinase-related protein 2                                            | O08553                                    | DPYSL2    | ↑                                                     |
| Mitogen-activated protein kinase 1                                               | P63085                                    | MAPK1     | ↑                                                     |
| Flotillin-1                                                                      | O08917                                    | FLOT1     | ↑                                                     |
| $\alpha$ -enolase                                                                | P17182                                    | ENO1      | ↑                                                     |
| LIM and SH3 domain protein 1                                                     | Q61792                                    | LASP1     | ↑                                                     |
| Septin-6                                                                         | Q9R1T4                                    | SEPTIN6   | ↓                                                     |

## References

1. Lin, X.; Wei, G.; Huang, Z.; Qu, Z.; Huang, X.; Xu, H.; Liu, J.; Zhuang, Z.; Yang, X. Mitochondrial Proteomic Alterations Caused by Long-Term Low-Dose Copper Exposure in Mouse Cortex. *Toxicology Letters* **2016**, *263*, 16–25, doi:10.1016/j.toxlet.2016.10.009.
2. Yu, H.; Wang, D.; Zou, L.; Zhang, Z.; Xu, H.; Zhu, F.; Ren, X.; Xu, B.; Yuan, J.; Liu, J.; et al. Proteomic Alterations of Brain Subcellular Organelles Caused by Low-Dose Copper Exposure: Implication for Alzheimer's Disease. *Arch Toxicol* **2018**, *92*, 1363–1382, doi:10.1007/s00204-018-2163-6.
3. Perluigi, M.; Sultana, R.; Cenini, G.; Domenico, F.D.; Memo, M.; Pierce, W.M.; Coccia, R.; Butterfield, D.A. Redox Proteomics Identification of 4-Hydroxynonenal-Modified Brain Proteins in Alzheimer's Disease: Role of Lipid Peroxidation in Alzheimer's Disease Pathogenesis. *PROTEOMICS – Clinical Applications* **2009**, *3*, 682–693, doi:https://doi.org/10.1002/prca.200800161.
4. Reed, T.T.; Pierce, W.M.; Markesbery, W.R.; Butterfield, D.A. Proteomic Identification of HNE-Bound Proteins in Early Alzheimer Disease: Insights into the Role of Lipid Peroxidation in the Progression of AD. *Brain Research* **2009**, *1274*, 66–76, doi:10.1016/j.brainres.2009.04.009.
5. Sultana, R.; Poon, H.F.; Cai, J.; Pierce, W.M.; Merchant, M.; Klein, J.B.; Markesbery, W.R.; Butterfield, D.A. Identification of Nitrated Proteins in Alzheimer's Disease Brain Using a Redox Proteomics Approach. *Neurobiology of Disease* **2006**, *22*, 76–87, doi:10.1016/j.nbd.2005.10.004.
